# Supplementary material
Source: PubMed Central journal article supplement (PMC4224163)
Supplement: 83803913032512fc70753aaabe41bf6f_genetics.114.167957-2.pdf [file 83803913032512fc70753aaabe41bf6f_genetics.114.167957-2.pdf]

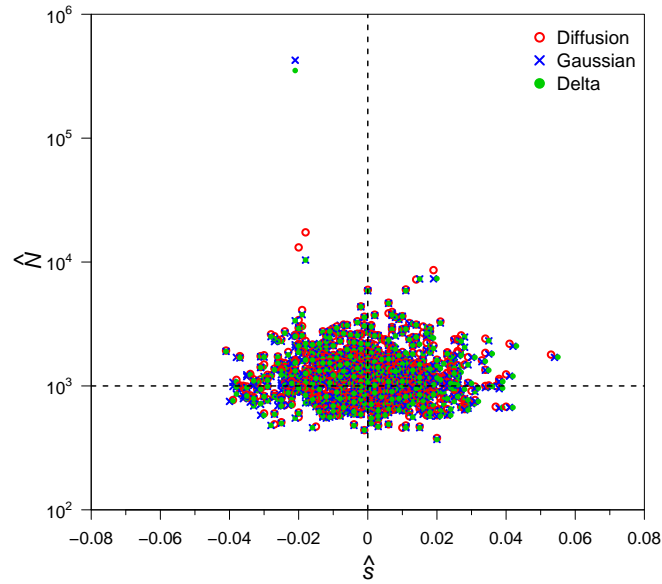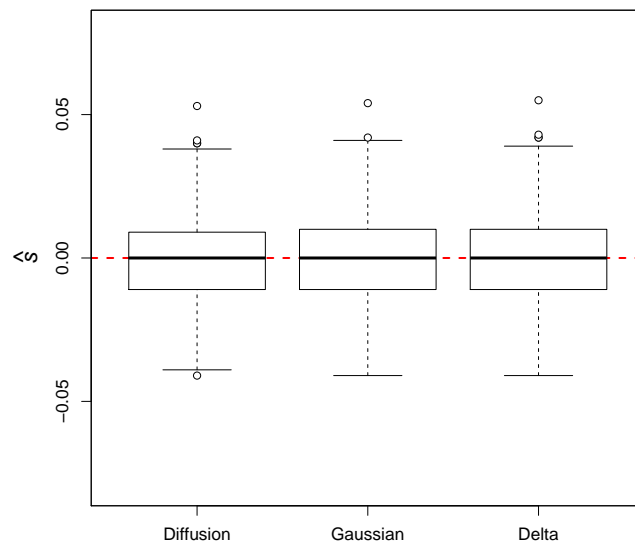

Figure S2: MLEs for  $N$  and  $s$  obtained in 1 000 datasets simulated with  $N = 1\,000$  and  $s = 0$ . Estimates were based on the mutant frequencies observed in samples of size 10 000 taken every generation for 20 generations of the process, starting with an initial population mutant frequency of  $p = 0.01$ .
